# Supplementary material
Source: ML conference proceedings conference paper supplement (https://proceedings.neurips.cc/paper_files/paper/2007/hash/c5ff2543b53f4cc0ad3819a36752467b-Abstract.html)

# Boosting the Area Under the ROC Curve (Poster M32)

Phil Long (Google) and Rocco Servedio (Columbia)

- Ranking problem
  - Given examples of members and nonmembers of a class, output scoring function
  - Goal: highest scorers mostly members
- AUC (Area Under the ROC Curve)
  - Standard criterion
  - Value  $\frac{1}{2}$  for random output
  - Value 1 for perfect output
- Theorem
  - Can “boost” the AUC (slightly better than  $\frac{1}{2}$  implies close to 1)
  - ... also with misclassification noise at rate  $\eta < \frac{1}{2}$ .
  - Contrasts w/ classification, where  $1 - \eta$  best possible [KS05]

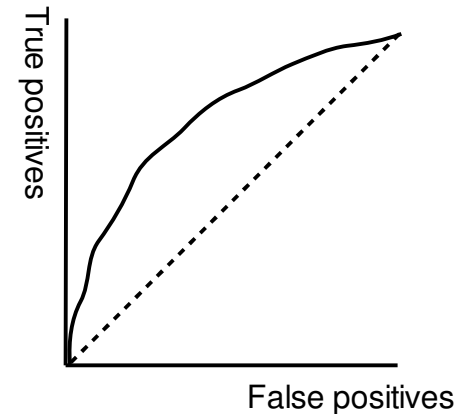

Supplement: Supplementary file [file c5ff2543b53f4cc0ad3819a36752467b-Supplemental.zip]
